# Supplementary material for: In Situ Synthesis of NiFeLDH/A–CBp from Pyrolytic Carbon as High-Performance Oxygen Evolution Reaction Catalyst for Water Splitting and Zinc Hydrometallurgy
Source: MDPI journal article supplement (doi:10.3390/ma16113997), 2023-05-26
Supplement: s1 [file s1]

# In Situ Synthesis of NiFeLDH/A–CBp from Pyrolytic Carbon as High-Performance Oxygen Evolution Reaction Catalyst for Water Splitting and Zinc Hydrometallurgy

Kai Che, Man Zhao \*, Yanzhi Sun and Junqing Pan \*

State Key Laboratory of Chemical Resources Engineering, College of Chemistry, Beijing University of Chemical Technology, Beijing 100029, China; chekai121@163.com (K.C.); sunyz@mail.buct.edu.cn (Y.S.)

\* Correspondence: 2022500073@buct.edu.cn (M.Z.); jqpan@buct.edu.cn (J.P.)

## 1.1 Electrochemical Measurement

The applied potential vs. Hg/HgO was converted into that vs. reversible hydrogen electrode (RHE) by the following formula (S1):

$$E_{\text{vs.RHE}} = E_{\text{vs.Hg/HgO}} + E_{\text{VS.Hg/HgO}}^{\theta} + 0.0591 \times \text{pH} \quad (\text{S1})$$

Electric double-layer capacitance ( $C_{\text{dl}}$ ) can be calculated by the following equation (S2):

$$i_c = C_{\text{dl}} \frac{d\psi}{dt} \quad (\text{S2})$$

Where  $\frac{d\psi}{dt}$  is the unit scan speed.

The polarization of the electrode reflects the obstruction of the electrode process, represented by the Tafel slope, as expressed in equation (S3):

$$\eta = a + b \times \log |I| \quad (\text{S3})$$

Where  $b$  is the Tafel slope.  $\eta$  is the overpotential,  $I$  is the current density, and  $a$  represents the overpotential value when the current density is measured in units ( $1 \text{ A} \cdot \text{cm}^{-2}$ ).

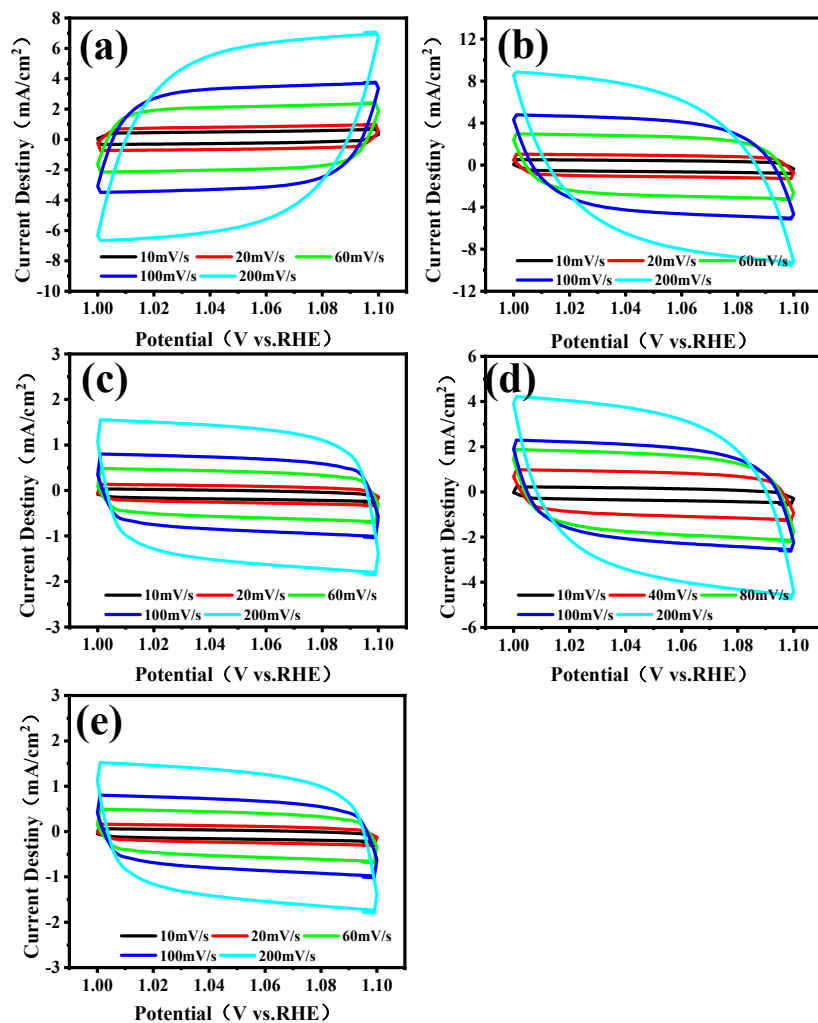

**Figure S1.** CV curves of NiFeLDH/A-CBp at different sweep speeds with different AA content. (a) 0 mmol, (b) 0.1 mmol, (c) 0.2 mmol, (d) 0.3 mmol, and (e) 0.4 mmol.

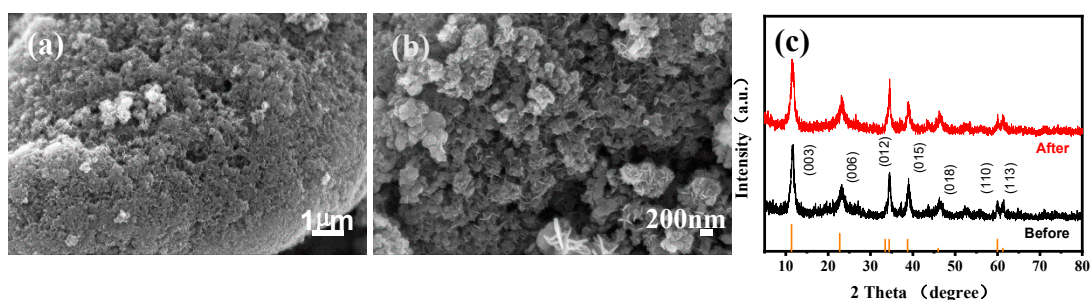

**Figure S2.** (a, b) SEM images of NiFeLDH/A-CBp after OER durability test. (c) XRD before and after OER durability test.

**Table S1.** The characterization of physical and electrochemical for as-prepared samples .

| Techniques                                       | Instrument model                                             | Company/Country | Conditions                  |
|--------------------------------------------------|--------------------------------------------------------------|-----------------|-----------------------------|
| Scanning electron microscopy (SEM)               | S-4700 model scanning electron microscope                    | ZEISS/Germany   | Operating voltage of 20 kV  |
| High-resolution transmission electron microscopy | JEM-2100F model high-resolution transmission electron micro- | JEOL/Japan      | Operating voltage of 120 kV |

|                                                |                                |                                     |                                                                                             |
|------------------------------------------------|--------------------------------|-------------------------------------|---------------------------------------------------------------------------------------------|
| (HR-TEM)                                       | scope                          |                                     |                                                                                             |
| X-ray diffraction (XRD)                        | Ultima IV                      | Rigaku Industrial Corporation/Japan | 2 $\theta$ ranging from 5-90° with Cu K $\alpha$ radiation at scan of 10° min <sup>-1</sup> |
| X-ray photoelectron spectroscopy (XPS)         | ESCALAB 250                    | Thermo Fisher Scientific/USA        | Al K $\alpha$ radiation                                                                     |
| Fourier Transform infrared spectroscopy (FTIR) | Thermo Scientific Nicolet iS10 | Nicolet /USA                        | KBr tableting                                                                               |
| Cyclic voltammetry (CV)                        | CHI 760D                       | Shanghai Chenhua Instrument, China  | Potential window from 1 to 1.1 V vs. Hg/HgO                                                 |
| Electrochemical impedance spectroscopy (EIS)   | CHI 760D                       | Shanghai Chenhua Instrument, China  | Frequency range from 0.01 Hz to 100,000 Hz with 5 mV amplitude. the potential range         |
| Linear sweep voltammetry (LSV)                 | CHI 760D                       | Shanghai Chenhua Instrument, China  | of 1.1–1.8 V (vs. RHE) at the scan rate of 5 mV • s <sup>-1</sup>                           |

**Table S2.** Comparison of catalysts with high OER activity in alkaline solution reported in various literature.

|                                                    | Overpotential (mV) |
|----------------------------------------------------|--------------------|
| This work                                          | 227                |
| CoMoV LDH [16]                                     | 270                |
| F-Co <sub>3</sub> Fe LDH[17]                       | 276                |
| Fe-NiNC-50[18]                                     | 340                |
| Ni <sub>1.5</sub> Co <sub>0.5</sub> @NC NT/NFs[19] | 243                |
| GDY@NiFe[20]                                       | 260                |
